# Supplementary figures and images for: Mononuclear Fe II and heterobinuclear Fe II Ni II thiolate complexes derived from a compartmental hexaazadithiophenolato ligand: synthesis, structure and properties
Source: Royal Society of Chemistry journal article supplement (doi:10.1039/d5dt02350e), 2025-11-21

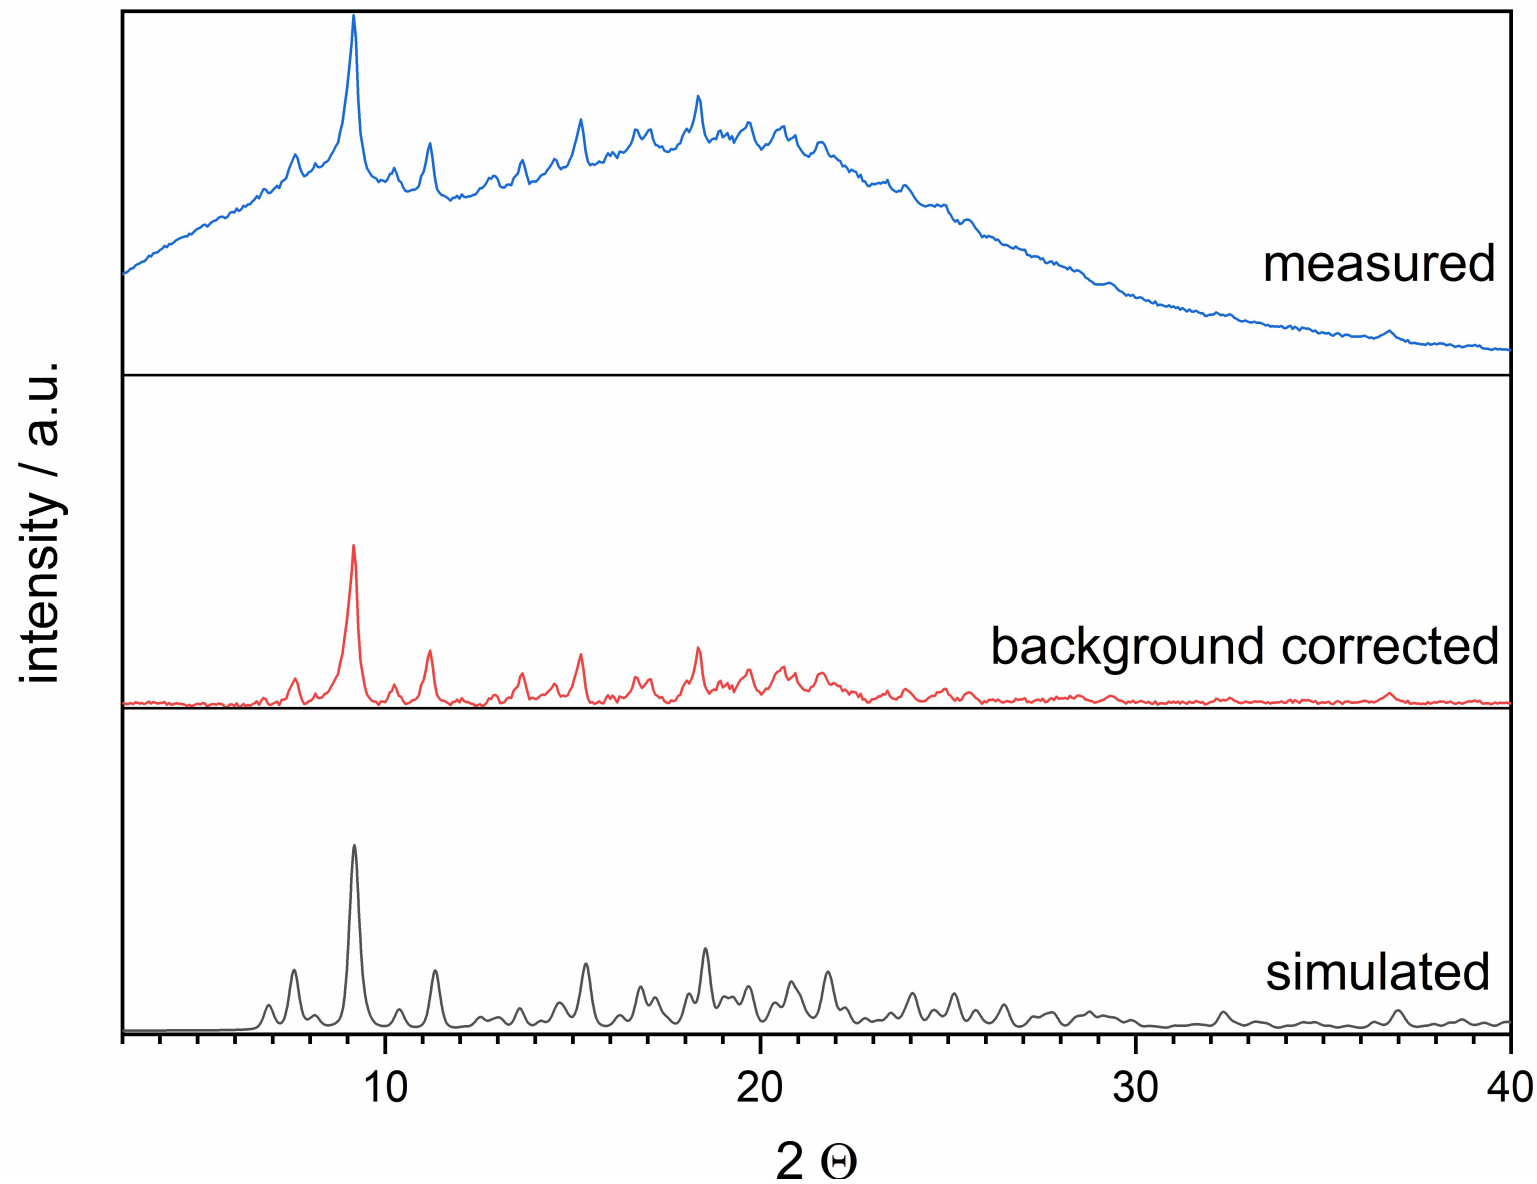

Supplement: d5dt02350e11.pdf [file d5dt02350e11.pdf]

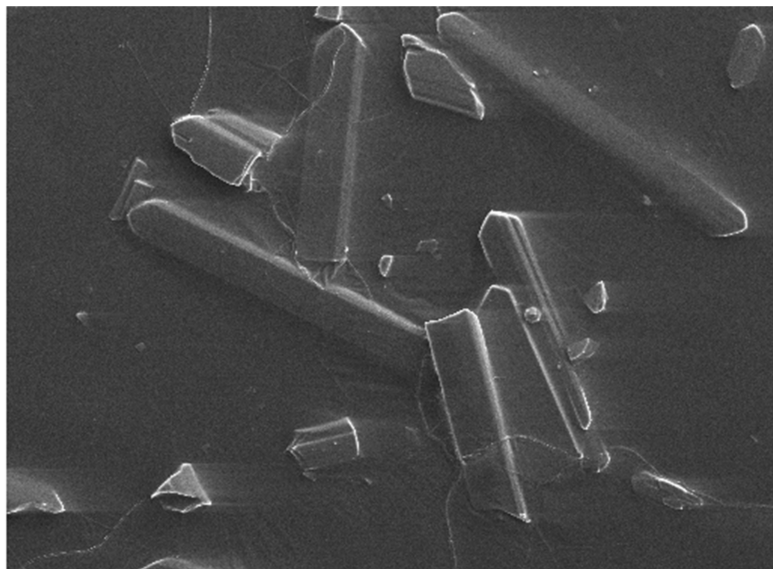

Electron Image 1

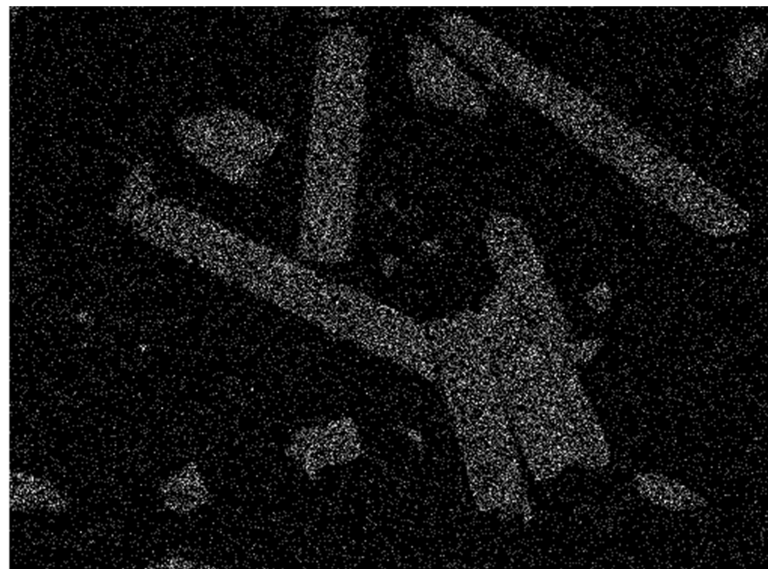

S Ka1

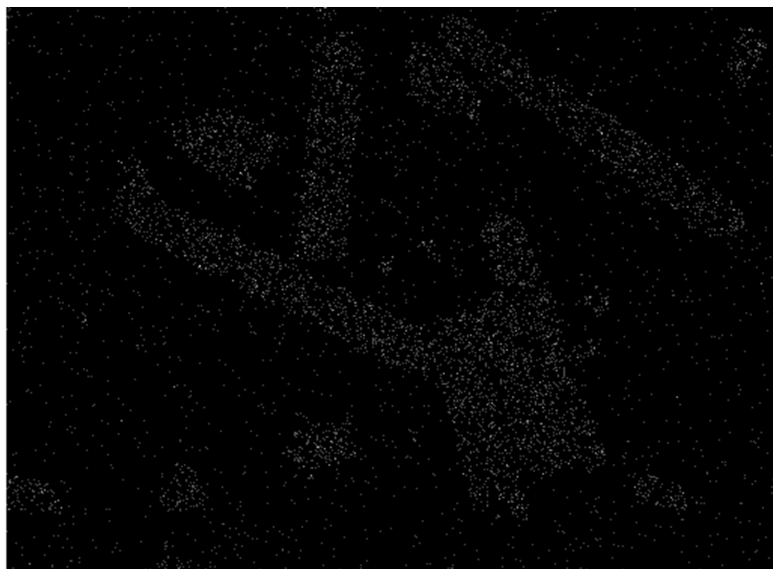

Ni Ka1

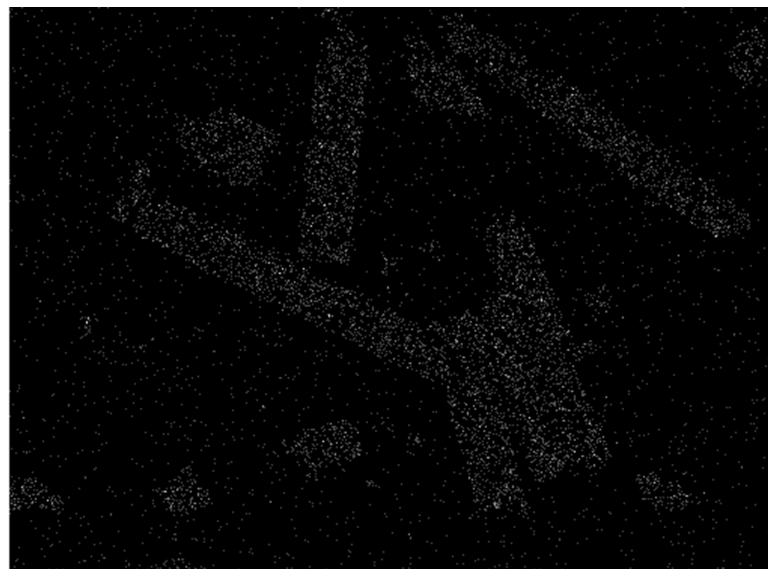

Fe Ka1

Supplement: d5dt02350e3.pdf [file d5dt02350e3.pdf]

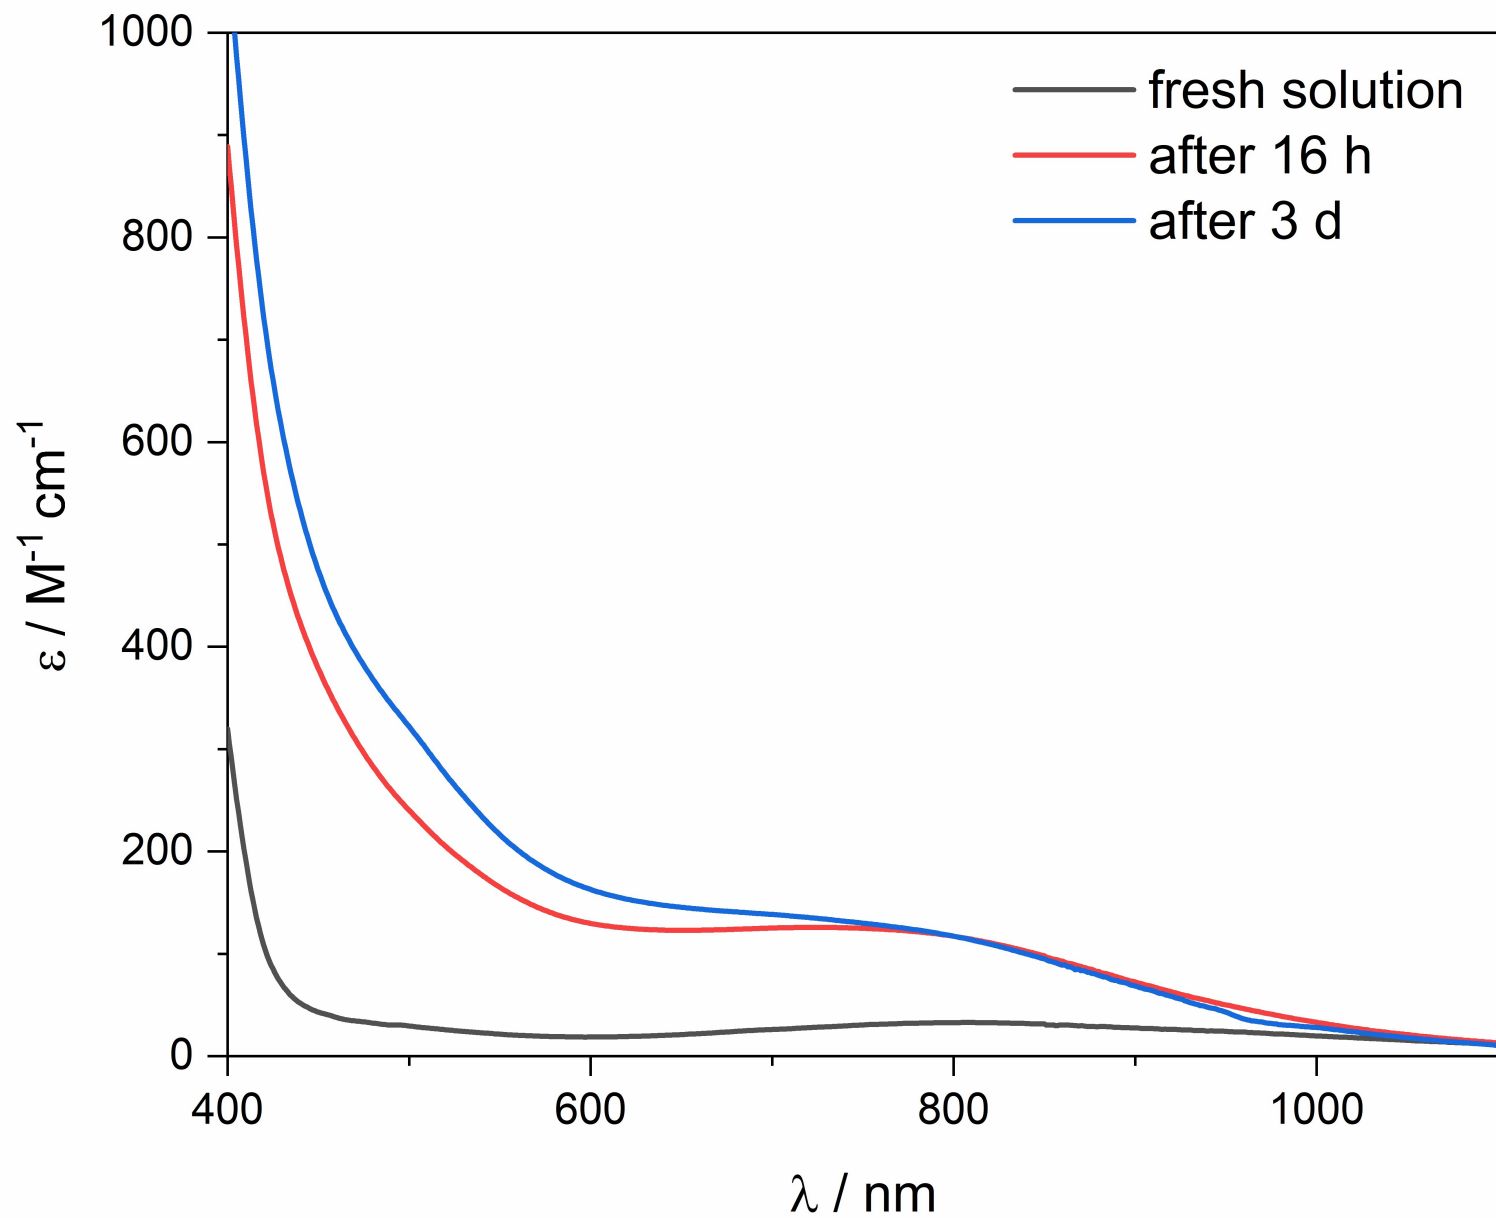

Supplement: d5dt02350e9.pdf [file d5dt02350e9.pdf]
